# Supplementary material for: Routine Data Sources Challenge International Diabetes Federation Extrapolations of National Diabetes Prevalence in Switzerland
Source: PubMed Central journal article supplement — Diabetes Care. 2011 Oct 15;34(11):2387–9. doi: 10.2337/dc11-0157 (PMC3198273; doi:10.2337/dc11-0157), 2011-10-15
Supplement: supp_dc11-0157v110157_DC110157SupplementaryData.pdf [file supp_dc11-0157v110157_DC110157SupplementaryData.pdf]

SUPPLEMENTARY DATA

**Supplementary Figure 1. Prevalence of diabetes in Switzerland by sex and age class: Comparison of three different data sources 2007/8 and trends 1995-2008**

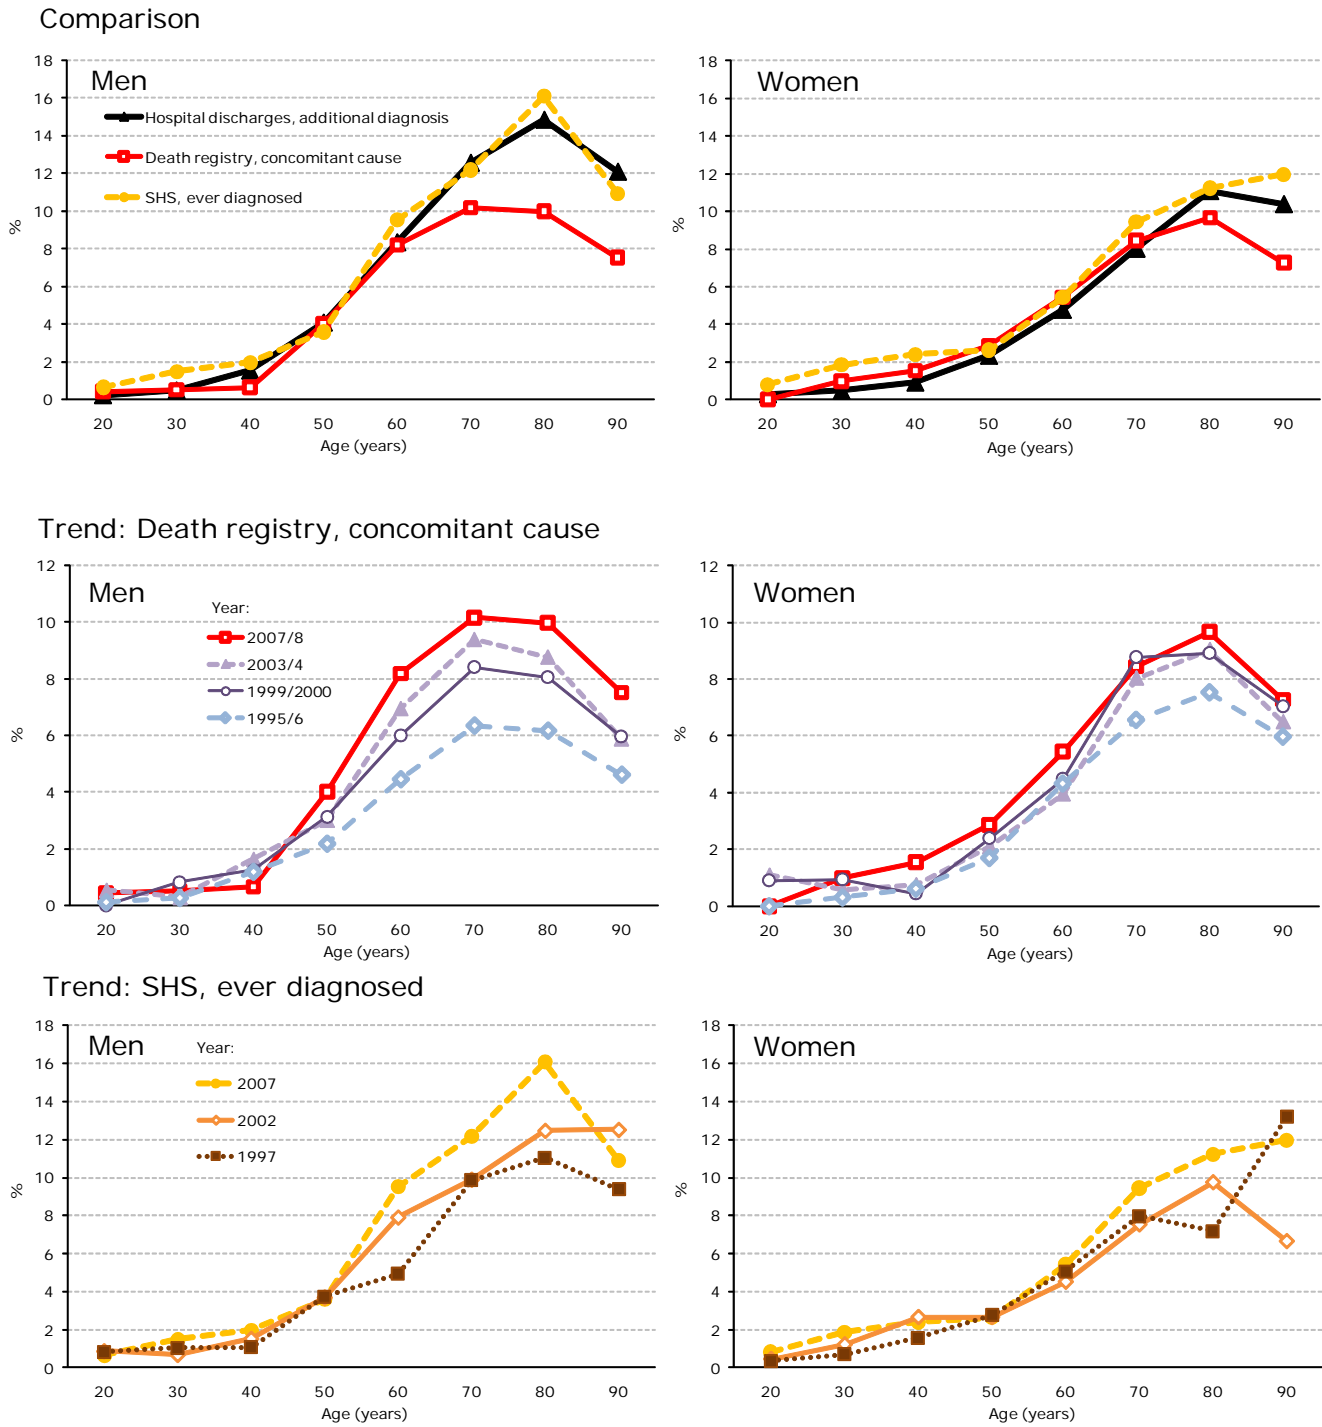

Swiss Health Survey (SHS): 2007: N=18,665 (66% participation), 2002: N=18,655 (64%), 1997: N=12,707 (60%)  
 Death registry: 2007/08: N=118,659, 2003/04: N=117,770, 1999/2000: N=121,013, 1995/96: N=122,986.
